# Supplementary material for: Transcriptomic identification of candidate genes involved in sunflower responses to chilling and salt stresses based on cDNA microarray analysis
Source: PubMed Central journal article supplement (PMC2265713; doi:10.1186/1471-2229-8-11), 2008-01-26

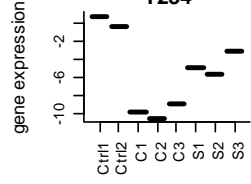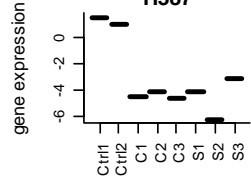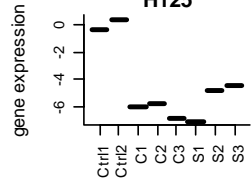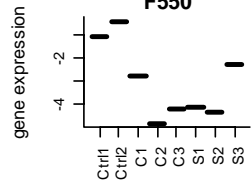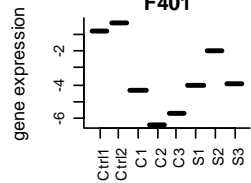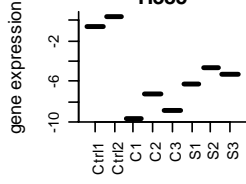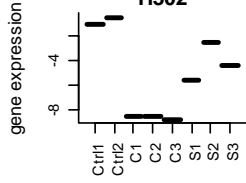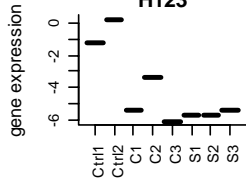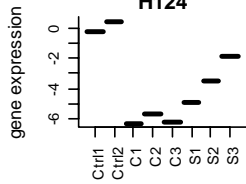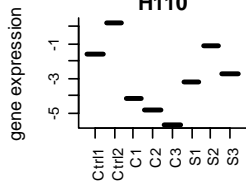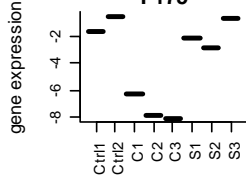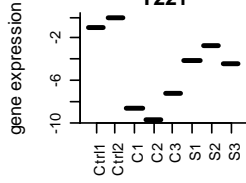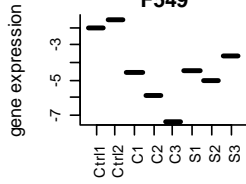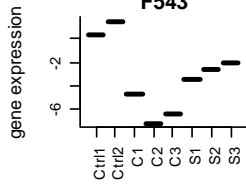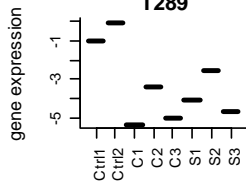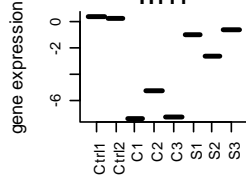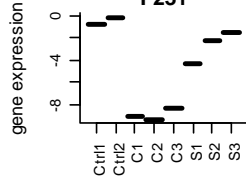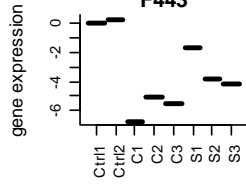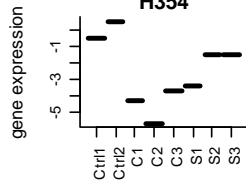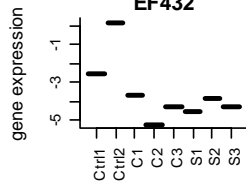

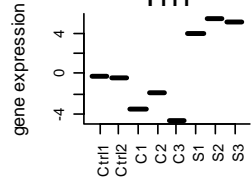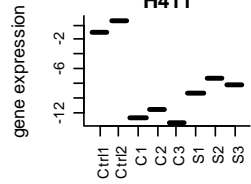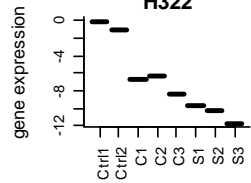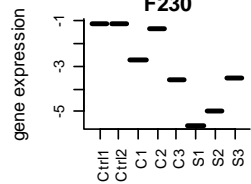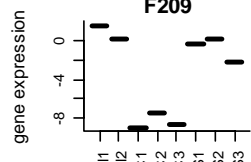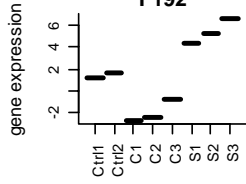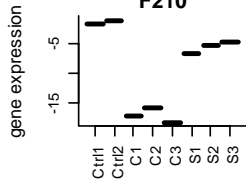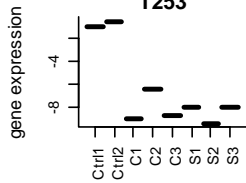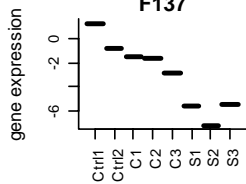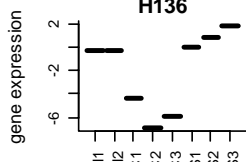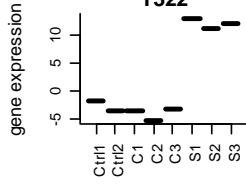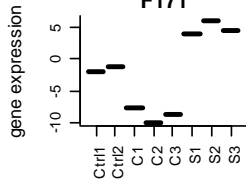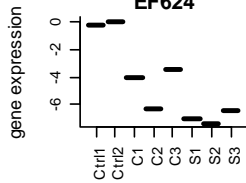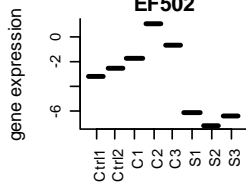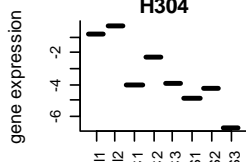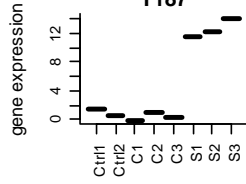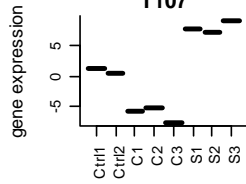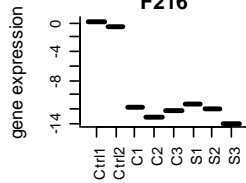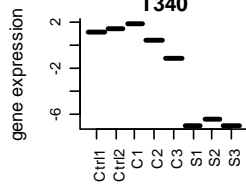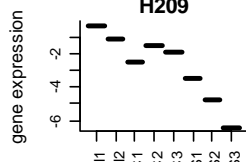

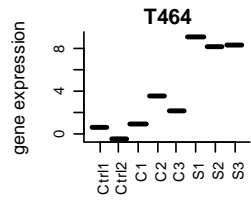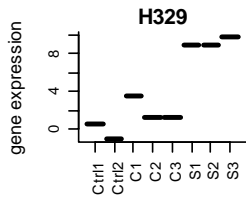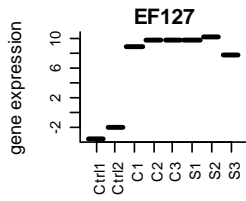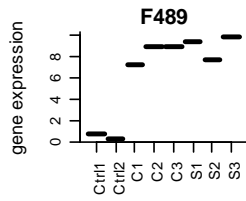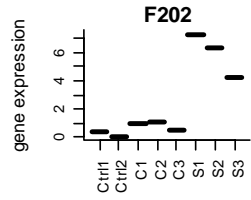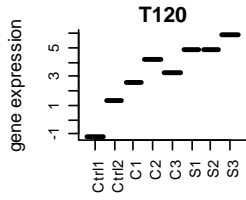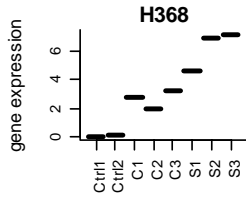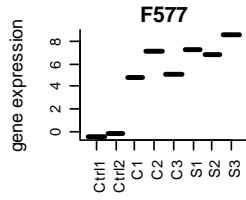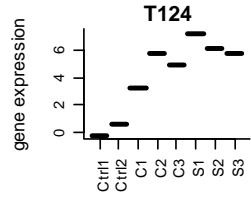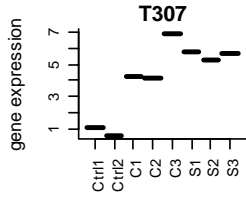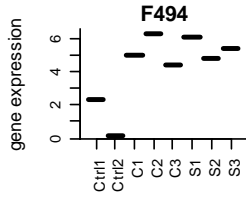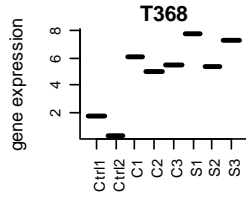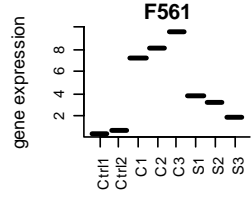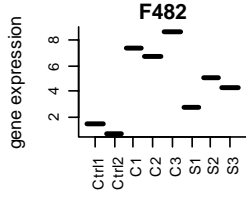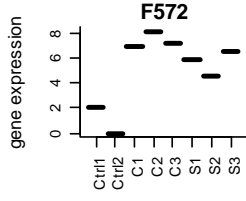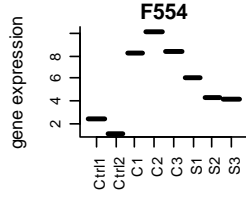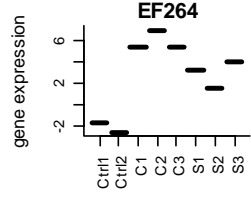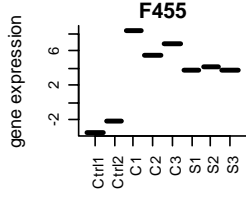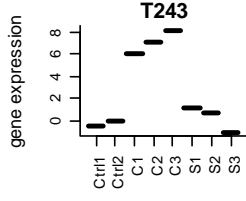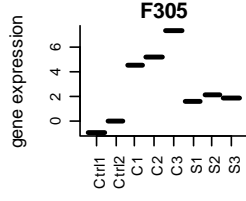

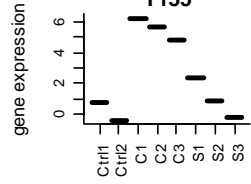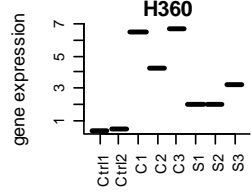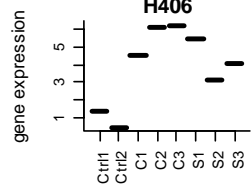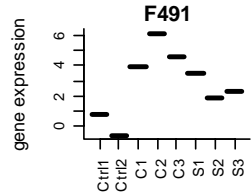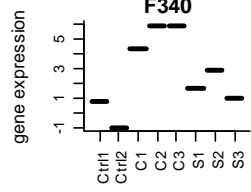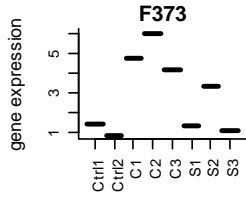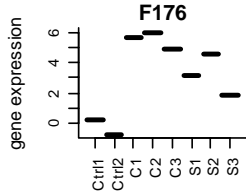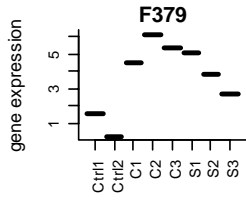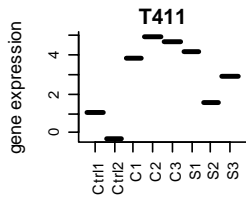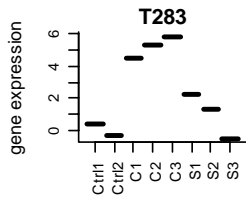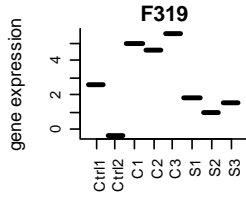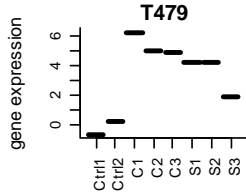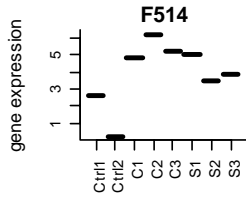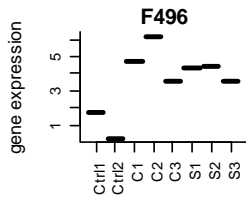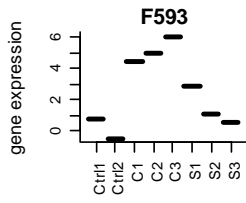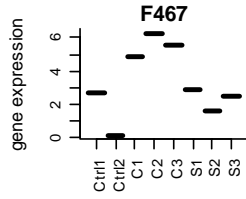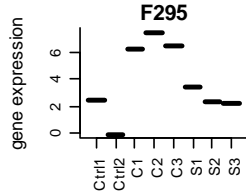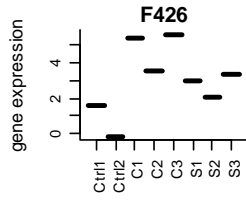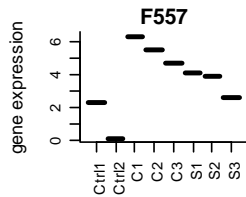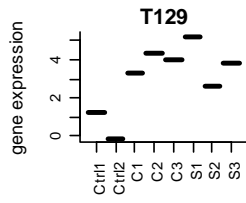

Supplement: 1471-2229-8-11-S2.pdf [file 1471-2229-8-11-S2.pdf]
