# Supplementary material for: Transcriptomic identification of candidate genes involved in sunflower responses to chilling and salt stresses based on cDNA microarray analysis
Source: PubMed Central journal article supplement (PMC2265713; doi:10.1186/1471-2229-8-11), 2008-01-26
Supplement: 1471-2229-8-11-S1.pdf [file 1471-2229-8-11-S1.pdf]

| GenBank<br>(dbEST)<br>Accession<br>Number     | EST<br>name | GO classification <sup>(1)</sup>                                  | Gene product                                                                                                                                  | Accession<br>number | Cold                                                |                | Salinity                                            |                |
|-----------------------------------------------|-------------|-------------------------------------------------------------------|-----------------------------------------------------------------------------------------------------------------------------------------------|---------------------|-----------------------------------------------------|----------------|-----------------------------------------------------|----------------|
|                                               |             |                                                                   |                                                                                                                                               |                     | Relative to<br>control<br>expression <sup>(2)</sup> | Fold<br>change | Relative to<br>control<br>expression <sup>(2)</sup> | Fold<br>change |
| <b>Central metabolism/Photosynthesis (10)</b> |             |                                                                   |                                                                                                                                               |                     |                                                     |                |                                                     |                |
| BU671793                                      | F175        | GO:0009523<br>(C, photosystem II)                                 | photosystem II 22-K chlorophyll-binding protein - rice                                                                                        | BAA12337.1          | Down                                                | -1.604         | NC                                                  | -1.060         |
| BU672070                                      | H124        | GO:0009765<br>(B, photosynthesis,<br>light harvesting)            | Q9SY97_ARATH PSI type III chlorophyll a/b-binding protein                                                                                     | AAD25555.1          | Down                                                | -1.844         | Down                                                | -1.412         |
| BU672060                                      | H125        | GO:0009765<br>(B, photosynthesis,<br>light harvesting)            | (AL132962) Lhca2 protein [ <i>Arabidopsis thaliana</i> ]                                                                                      | CAB71077.1          | Down                                                | -2.246         | Down                                                | -2.015         |
| BU672102                                      | H136        | GO:0009055<br>(M, electron carrier<br>activity)                   | O04002_SOLTU CDSP32 protein (Chloroplast Drought-induced Stress Protein of 32kDa) general metabolisms                                         | O04002              | Down                                                | -2.015         | NC                                                  | 1.186          |
| BU672078                                      | H302        | GO:0009507<br>(C, chloroplast)                                    | Magnesium-protoporphyrin IX monomethyl este                                                                                                   | Q9M591              | Down                                                | -1.881         | Down                                                | -1.314         |
| BU672090                                      | H385        | GO:0042132<br>(M, fructose-<br>bisphosphatase activity)           | fructose-1,6-bisphosphatase [ <i>Pisum sativum</i> ]                                                                                          | 5305145             | Down                                                | -2.399         | Down                                                | -1.749         |
| BU672091                                      | H411        | GO:0009538<br>(C, photosystem I<br>reaction center)               | SAF_FLATR PHOTOSYSTEM I REACTION CENTRE SUBUNIT III PRECURSOR (LIGHT-HARVESTING COMPLEX I 17 KD PROTEIN) (PSI-F) ( <i>Flaveria trinerva</i> ) | AAA33344.1          | Down                                                | -2.453         | Down                                                | -1.803         |
| BU671800                                      | T129        | GO:0009765<br>(B, photosynthesis,<br>light harvesting)            | Q9SDT2_DAUCA Chlorophyll a/b-binding protein.                                                                                                 | AAF20948.1          | Up                                                  | 1.262          | Up                                                  | 1.269          |
| BU671843                                      | T340        | GO:0004356<br>(M, glutamate-ammonia<br>ligase activity)           | O04961_HELAN Chloroplatic glutamine synthetase (EC 6.3.1.2) (Fragment) general metabolism                                                     | AAN84537.1          | NC                                                  | -1.046         | Down                                                | -1.522         |
| BU671801                                      | T411        | GO:0004332<br>(M, fructose-<br>bisphosphate aldolase<br>activity) | Q9SXX5_NICPA Plastidic aldolase general metabolism                                                                                            | BAA77603.1          | Up                                                  | 1.498          | Up                                                  | 1.282          |
| <b>Translation machinery (6)</b>              |             |                                                                   |                                                                                                                                               |                     |                                                     |                |                                                     |                |
| BU671926                                      | F230        | GO:0003735<br>(M, structural                                      | <i>Solanum lycopersicon</i> ribosomal protein L2 protein                                                                                      | CAA45863.1          | NC                                                  | -1.071         | Down                                                | -1.180         |

| GenBank<br>(dbEST)<br>Accession<br>Number        | EST<br>name | GO classification <sup>(1)</sup>                                | Gene product                                                                             | Accession<br>number | Cold                                                |                | Salinity                                            |                |
|--------------------------------------------------|-------------|-----------------------------------------------------------------|------------------------------------------------------------------------------------------|---------------------|-----------------------------------------------------|----------------|-----------------------------------------------------|----------------|
|                                                  |             |                                                                 |                                                                                          |                     | Relative to<br>control<br>expression <sup>(2)</sup> | Fold<br>change | Relative to<br>control<br>expression <sup>(2)</sup> | Fold<br>change |
|                                                  |             | constituent of ribosome)                                        |                                                                                          |                     |                                                     |                |                                                     |                |
| BU672008                                         | F467        | GO:0003735<br>(M, structural<br>constituent of ribosome)        | <i>Arabidopsis thaliana</i> 60S ribosomal protein L13a protein                           | BAB09429.1          | Up                                                  | 1.660          | NC                                                  | 1.105          |
| BU672004                                         | F455        | No GO term                                                      | Q517K2_WHEAT Ribosomal protein S7                                                        | Q517K2              | Up                                                  | 1.503          | Up                                                  | 1.323          |
| BU672017                                         | F550        | No GO term                                                      | Translation initiation factor B04 [ <i>Helianthus annuus</i> ]                           | 21842314            | Down                                                | -1.366         | Down                                                | 1.321          |
| BU671923                                         | F577        | GO:0003723<br>(M, RNA binding)                                  | RS4_SOLTU 40S RIBOSOMAL PROTEIN S4 (potato)                                              | AAC24585.1          | Up                                                  | 1.222          | Up                                                  | 1.306          |
| BU671873                                         | T111        | GO:0003746<br>(M, translation<br>elongation factor<br>activity) | <i>Solanum lycopersicon</i> elongation factor 1-alpha protein                            | CAA37212.1          | NC                                                  | -1.185         | Up                                                  | 1.376          |
| <b>No homology (1)</b>                           |             |                                                                 |                                                                                          |                     |                                                     |                |                                                     |                |
| BU672056                                         | H110        | No GO term                                                      | No homology in databases                                                                 |                     | Down                                                | -1.618         | Down                                                | -1.208         |
| <b>Transcriptional machinery (4)</b>             |             |                                                                 |                                                                                          |                     |                                                     |                |                                                     |                |
| BU671940                                         | F305        | GO:0003677<br>(M, DNA binding)                                  | 41 kD chloroplast nucleid DNA binding protein (CND41)<br>[ <i>Nicotiana sylvestris</i> ] | 24430421            | Up                                                  | 1.550          | NC                                                  | 1.171          |
| BU672034                                         | F561        | No GO term                                                      | Zinc finger family protein (Fragment)                                                    | Q5ULY2              | Up                                                  | 1.547          | NC                                                  | 1.138          |
| BU671817                                         | T187        | GO:0003677<br>(M, DNA binding)                                  | MBD4; DNA binding [ <i>Arabidopsis thaliana</i> ]                                        | 15229373            | NC                                                  | -1.025         | Up                                                  | 1.715          |
| BU671860                                         | T464        | GO:0006118<br>(B, electron transport)                           | Single-stranded DNA binding [ <i>Medicago truncatula</i> ]                               | ABD28355.1          | NC                                                  | 1.225          | Up                                                  | 1.306          |
| <b>Signaling machinery (2)</b>                   |             |                                                                 |                                                                                          |                     |                                                     |                |                                                     |                |
| BU671885                                         | EF127       | GO:0003924<br>(M, GTPase activity)                              | ADP-ribosylation factor 1.                                                               | Q7F270_ORYS<br>A    | Up                                                  | 1.759          | Up                                                  | 1.743          |
| BU671830                                         | T234        | No GO term                                                      | Extracellular Ca sensing receptor ( <i>Arabidopsis</i> )                                 | Q9FN48              | Down                                                | -2.181         | Down                                                | -1.445         |
| <b>Protein turnover/folding/interactions (5)</b> |             |                                                                 |                                                                                          |                     |                                                     |                |                                                     |                |
| BU671886                                         | EF264       | GO:0004175<br>(M, endopeptidase<br>activity)                    | <i>Arabidopsis thaliana</i> multicatalytic endopeptidase protein                         | CAA73619.1          | Up                                                  | 1.267          | NC                                                  | 1.162          |
| BU671928                                         | F231        | GO:0003755<br>(M, peptidyl-prolyl cis-                          | Q7XY71_9ROSI Cyclophilin (Fragment)                                                      | Q7XY71              | Up                                                  | -1.395         | NC                                                  | -1.089         |

| GenBank<br>(dbEST)<br>Accession<br>Number | EST<br>name | GO classification <sup>(1)</sup>                                                            | Gene product                                                                                 | Accession<br>number | Cold                                                |                | Salinity                                            |                |
|-------------------------------------------|-------------|---------------------------------------------------------------------------------------------|----------------------------------------------------------------------------------------------|---------------------|-----------------------------------------------------|----------------|-----------------------------------------------------|----------------|
|                                           |             |                                                                                             |                                                                                              |                     | Relative to<br>control<br>expression <sup>(2)</sup> | Fold<br>change | Relative to<br>control<br>expression <sup>(2)</sup> | Fold<br>change |
|                                           |             | trans isomerase activity)                                                                   |                                                                                              |                     |                                                     |                |                                                     |                |
| BU671999                                  | F443        | GO:0003743<br>(M, translation<br>initiation factor activity)                                | Copper chaperone [ <i>Lycopersicon esculentum</i> ]                                          | 30039180            | Down                                                | -1.179         | Down                                                | -1.103         |
| BU671806                                  | T124        | GO:0005524<br>(M, ATP binding<br>activity)                                                  | Q8LKP8_SAUME Heat shock protein                                                              | Q8LKP8              | Up                                                  | 1.355          | Up                                                  | 1.520          |
| BU671835                                  | T289        | GO:0004374<br>(M, glycine cleavage<br>system)                                               | <i>Flaveria pringlei</i> P-protein of the glycine cleavage system protein                    | CAA85353.1          | Down                                                | -1.395         | Down                                                | -1.305         |
| <b>Transport (3)</b>                      |             |                                                                                             |                                                                                              |                     |                                                     |                |                                                     |                |
| BU671910                                  | EF502       | GO:0016068<br>(B, type I<br>hypersensitivity)                                               | <i>Gossypium hirsutum</i> lipid transfer protein precursor protein transport                 | AAF35184.1          | Up                                                  | 1.101          | Down                                                | -1.141         |
| BU672086                                  | H360        | GO:0046961<br>(M, hydrogen ion<br>transporting ATPase<br>activity, rotational<br>mechanism) | ATP synthase beta subunit [ <i>Helianthus annuus</i> ]                                       | CAB65035.1          | Up                                                  | 1.814          | Up                                                  | 1.246          |
| BU672042                                  | F557        | GO:0005488<br>(M, binding)                                                                  | ARATH A_IG002N01.16 protein (Putative carrier protein)                                       | AAL07192.1          | Up                                                  | 1.798          | Up                                                  | 1.368          |
| <b>Secondary metabolism (3)</b>           |             |                                                                                             |                                                                                              |                     |                                                     |                |                                                     |                |
| BU672069                                  | H123        | GO:0004512<br>(M, inositol-3-<br>phosphate synthase<br>activity)                            | myo-inositol-1-phosphate synthase (EC 5.5.1.4) - common ice plant                            | BAA84084.1          | Down                                                | -1.429         | Down                                                | -1.515         |
| BU672083                                  | H322        | No GO term                                                                                  | Q43469_HELAN Delta-8 sphingolipid desaturase                                                 | Q9ZRP7              | Down                                                | -1.288         | Down                                                | -1.467         |
| BU671815                                  | T322        | GO:0004497<br>(M, monooxygenase<br>activity)                                                | <i>Glycine max</i> geranylgeranyl hydrogenase protein.                                       | AAD28640.1          | NC                                                  | -1.041         | Up                                                  | 1.548          |
| <b>ROS machinery (7)</b>                  |             |                                                                                             |                                                                                              |                     |                                                     |                |                                                     |                |
| BU672105                                  | H354        | GO:0008137<br>(M, NADH                                                                      | NADH-plastoquinone oxidoreductase subunit 4 [ <i>Oenothera elata</i> subsp. <i>hookeri</i> ] | CAB67220.1          | Down                                                | -1.381         | Down                                                | -1.168         |

| GenBank<br>(dbEST)<br>Accession<br>Number | EST<br>name | GO classification <sup>(1)</sup>                   | Gene product                                                                          | Accession<br>number | Cold                                                |                | Salinity                                            |                |
|-------------------------------------------|-------------|----------------------------------------------------|---------------------------------------------------------------------------------------|---------------------|-----------------------------------------------------|----------------|-----------------------------------------------------|----------------|
|                                           |             |                                                    |                                                                                       |                     | Relative to<br>control<br>expression <sup>(2)</sup> | Fold<br>change | Relative to<br>control<br>expression <sup>(2)</sup> | Fold<br>change |
|                                           |             | dehydrogenase<br>(ubiquinone) activity)            |                                                                                       |                     |                                                     |                |                                                     |                |
| BU671805                                  | T120        | GO:0009055<br>(M, electron carrier<br>activity)    | Q84LB8_ZANAE Glycolate oxidase (EC 1.1.3.15) (EC 1.1.3.1)<br>ROS machinery            | Q84LB8              | Up                                                  | 1.178          | Up                                                  | 1.292          |
| BU671812                                  | T155        | GO:0009055<br>(M, electron carrier<br>activity)    | Putative thioredoxin reductase [ <i>Hordeum vulgare</i> subsp. <i>vulgare</i> ]       | 38174811            | Up                                                  | 1.467          | NC                                                  | 1.064          |
| BU671825                                  | T221        | GO:0004301<br>(M, epoxide hydrolase<br>activity)   | catalytic/ hydrolase [ <i>Arabidopsis thaliana</i> ] ROS machinery                    | NP_849507.1         | Down                                                | -2.072         | Down                                                | -1.337         |
| BU671832                                  | T243        | GO:0006986<br>(B, response to<br>unfolded protein) | HSP7S_PEA Stromal 70 kDa heat shock-related protein,<br>chloroplast precursor         | Q02028              | Up                                                  | 1.509          | NC                                                  | 1.035          |
| BU671838                                  | T307        | GO:0004096<br>(M, catalase activity)               | <i>Helianthus annuus</i> catalase protein                                             | AAA69866            | Up                                                  | 1.730          | Up                                                  | 1.801          |
| BU671846                                  | T368        | GO:0009507<br>(C, chloroplast)                     | PSBQ2_ARATH Oxygen-evolving enhancer protein 3-2,<br>chloroplast precursor (OEE3) (16 | Q41932              | Up                                                  | 1.225          | Up                                                  | 1.306          |
| <b>Unclassified</b>                       |             |                                                    |                                                                                       |                     |                                                     |                |                                                     |                |
| BU672101                                  | EF432       |                                                    | No GO Term associated                                                                 |                     | Down                                                | -1.319         | Down                                                | -1.307         |
| BU671912                                  | EF624       |                                                    | No GO Term associated                                                                 |                     | Down                                                | -1.751         | Down                                                | -2.372         |
| BU671986                                  | F137        |                                                    | No GO Term associated                                                                 |                     | NC                                                  | -1.185         | Down                                                | -1.599         |
| BU671987                                  | F171        |                                                    | No GO Term associated                                                                 |                     | Down                                                | -1.797         | Up                                                  | 1.689          |
| BU671919                                  | F176        |                                                    | No GO Term associated                                                                 |                     | Up                                                  | 1.280          | Up                                                  | 1.163          |
| BU671924                                  | F192        |                                                    | No GO Term associated                                                                 |                     | NC                                                  | -1.085         | Up                                                  | 1.100          |
| BU671945                                  | F202        |                                                    | Q9SL05_ARATH Expressed protein (At2g05620/T20G20.3)                                   | Q9SL05              | NC                                                  | 1.062          | Up                                                  | 1.669          |
| BU671949                                  | F209        |                                                    | No GO Term associated                                                                 |                     | Down                                                | -1.263         | NC                                                  | -1.044         |
| BU671950                                  | F210        |                                                    | No GO Term associated                                                                 |                     | Down                                                | -1.773         | NC                                                  | -1.165         |
| BU671927                                  | F216        |                                                    | No GO Term associated                                                                 |                     | Down                                                | -1.941         | Down                                                | -1.938         |
| BU671931                                  | F295        |                                                    | No GO Term associated                                                                 |                     | Up                                                  | 1.396          | NC                                                  | 1.091          |
| BU671961                                  | F319        |                                                    | No GO Term associated                                                                 |                     | Up                                                  | 1.821          | NC                                                  | 1.029          |
| BU671965                                  | F340        |                                                    | No GO Term associated                                                                 |                     | Up                                                  | 1.261          | NC                                                  | 1.085          |

| GenBank<br>(dbEST)<br>Accession<br>Number | EST<br>name | GO classification <sup>(1)</sup>        | Gene product                                                   | Accession<br>number | Cold                                                |                | Salinity                                            |                |
|-------------------------------------------|-------------|-----------------------------------------|----------------------------------------------------------------|---------------------|-----------------------------------------------------|----------------|-----------------------------------------------------|----------------|
|                                           |             |                                         |                                                                |                     | Relative to<br>control<br>expression <sup>(2)</sup> | Fold<br>change | Relative to<br>control<br>expression <sup>(2)</sup> | Fold<br>change |
| BU671980                                  | F373        |                                         | No GO Term associated                                          |                     | Up                                                  | 1.461          | NC                                                  | 1.085          |
| BU671983                                  | F379        |                                         | No GO Term associated                                          |                     | Up                                                  | 1.306          | NC                                                  | 1.191          |
| BU671988                                  | F401        |                                         | No GO Term associated                                          |                     | Down                                                | -1.511         | Down                                                | -1.265         |
| BU671788                                  | F406        |                                         | No GO Term associated                                          |                     | Up                                                  | 2.074          | Up                                                  | 1.677          |
| BU672039                                  | F426        |                                         | No GO Term associated                                          |                     | Up                                                  | 1.387          | NC                                                  | 1.172          |
| BU672013                                  | F482        |                                         | No GO Term associated                                          |                     | Up                                                  | 1.600          | Up                                                  | 1.238          |
| BU672016                                  | F489        |                                         | No GO Term associated                                          |                     | Up                                                  | 1.469          | Up                                                  | 1.519          |
| BU672017                                  | F491        |                                         | No GO Term associated                                          |                     | Up                                                  | 1.697          | Up                                                  | 1.314          |
| BU672019                                  | F494        |                                         | No GO Term associated                                          |                     | Up                                                  | 1.272          | Up                                                  | 1.288          |
| BU672020                                  | F496        |                                         | No GO Term associated                                          |                     | Up                                                  | 1.421          | Up                                                  | 1.328          |
| BU672110                                  | F514        |                                         | No GO Term associated                                          |                     | Up                                                  | 1.389          | Up                                                  | 1.240          |
| BU672026                                  | F543        |                                         | similar to unknown protein [ <i>Arabidopsis thaliana</i> ]     | BAB02703.1          | Down                                                | -1.587         | Down                                                | -1.271         |
| BU672028                                  | F549        |                                         | No GO Term associated                                          |                     | Down                                                | -1.350         | Down                                                | -1.213         |
| BU672032                                  | F554        |                                         | No GO Term associated                                          |                     | Up                                                  | 1.415          | NC                                                  | 1.155          |
| BU672046                                  | F572        |                                         | No GO Term associated                                          |                     | Up                                                  | 1.344          | Up                                                  | 1.237          |
| BU672051                                  | F593        |                                         | No GO Term associated                                          |                     | Up                                                  | 1.517          | NC                                                  | 1.126          |
| BU671789                                  | H111        |                                         | No GO Term associated                                          |                     | Down                                                | -2.094         | NC                                                  | -1.198         |
| BU672074                                  | H209        |                                         | No GO Term associated                                          |                     | NC                                                  | -1.158         | Down                                                | -1.624         |
| BU672079                                  | H304        |                                         | No GO Term associated                                          |                     | Down                                                | -1.477         | Down                                                | -1.908         |
| BU672084                                  | H329        |                                         | No GO Term associated                                          |                     | NC                                                  | 1.110          | Up                                                  | 1.527          |
| BU672087                                  | H368        |                                         | No GO Term associated                                          |                     | Up                                                  | 1.241          | Up                                                  | 1.687          |
| BU672092                                  | H387        |                                         | No GO Term associated                                          |                     | Down                                                | -1.328         | Down                                                | -1.329         |
| BU671799                                  | T107        |                                         | No GO Term associated                                          |                     | Down                                                | -1.333         | Up                                                  | 1.348          |
| BU671868                                  | T253        |                                         | No GO Term associated                                          |                     | Down                                                | -1.593         | Down                                                | -1.645         |
| BU671875                                  | T283        | GO:0016740<br>(M, transferase activity) | Os03g0651000 [ <i>Oryza sativa (japonica cultivar-group)</i> ] | 115454377           | Up                                                  | 1.609          | NC                                                  | 1.105          |
| BU671862                                  | T479        |                                         |                                                                |                     | Up                                                  | 1.794          | Up                                                  | 1.470          |
