# Supplementary material for: Transcriptomic identification of candidate genes involved in sunflower responses to chilling and salt stresses based on cDNA microarray analysis
Source: PubMed Central journal article supplement (PMC2265713; doi:10.1186/1471-2229-8-11), 2008-01-26

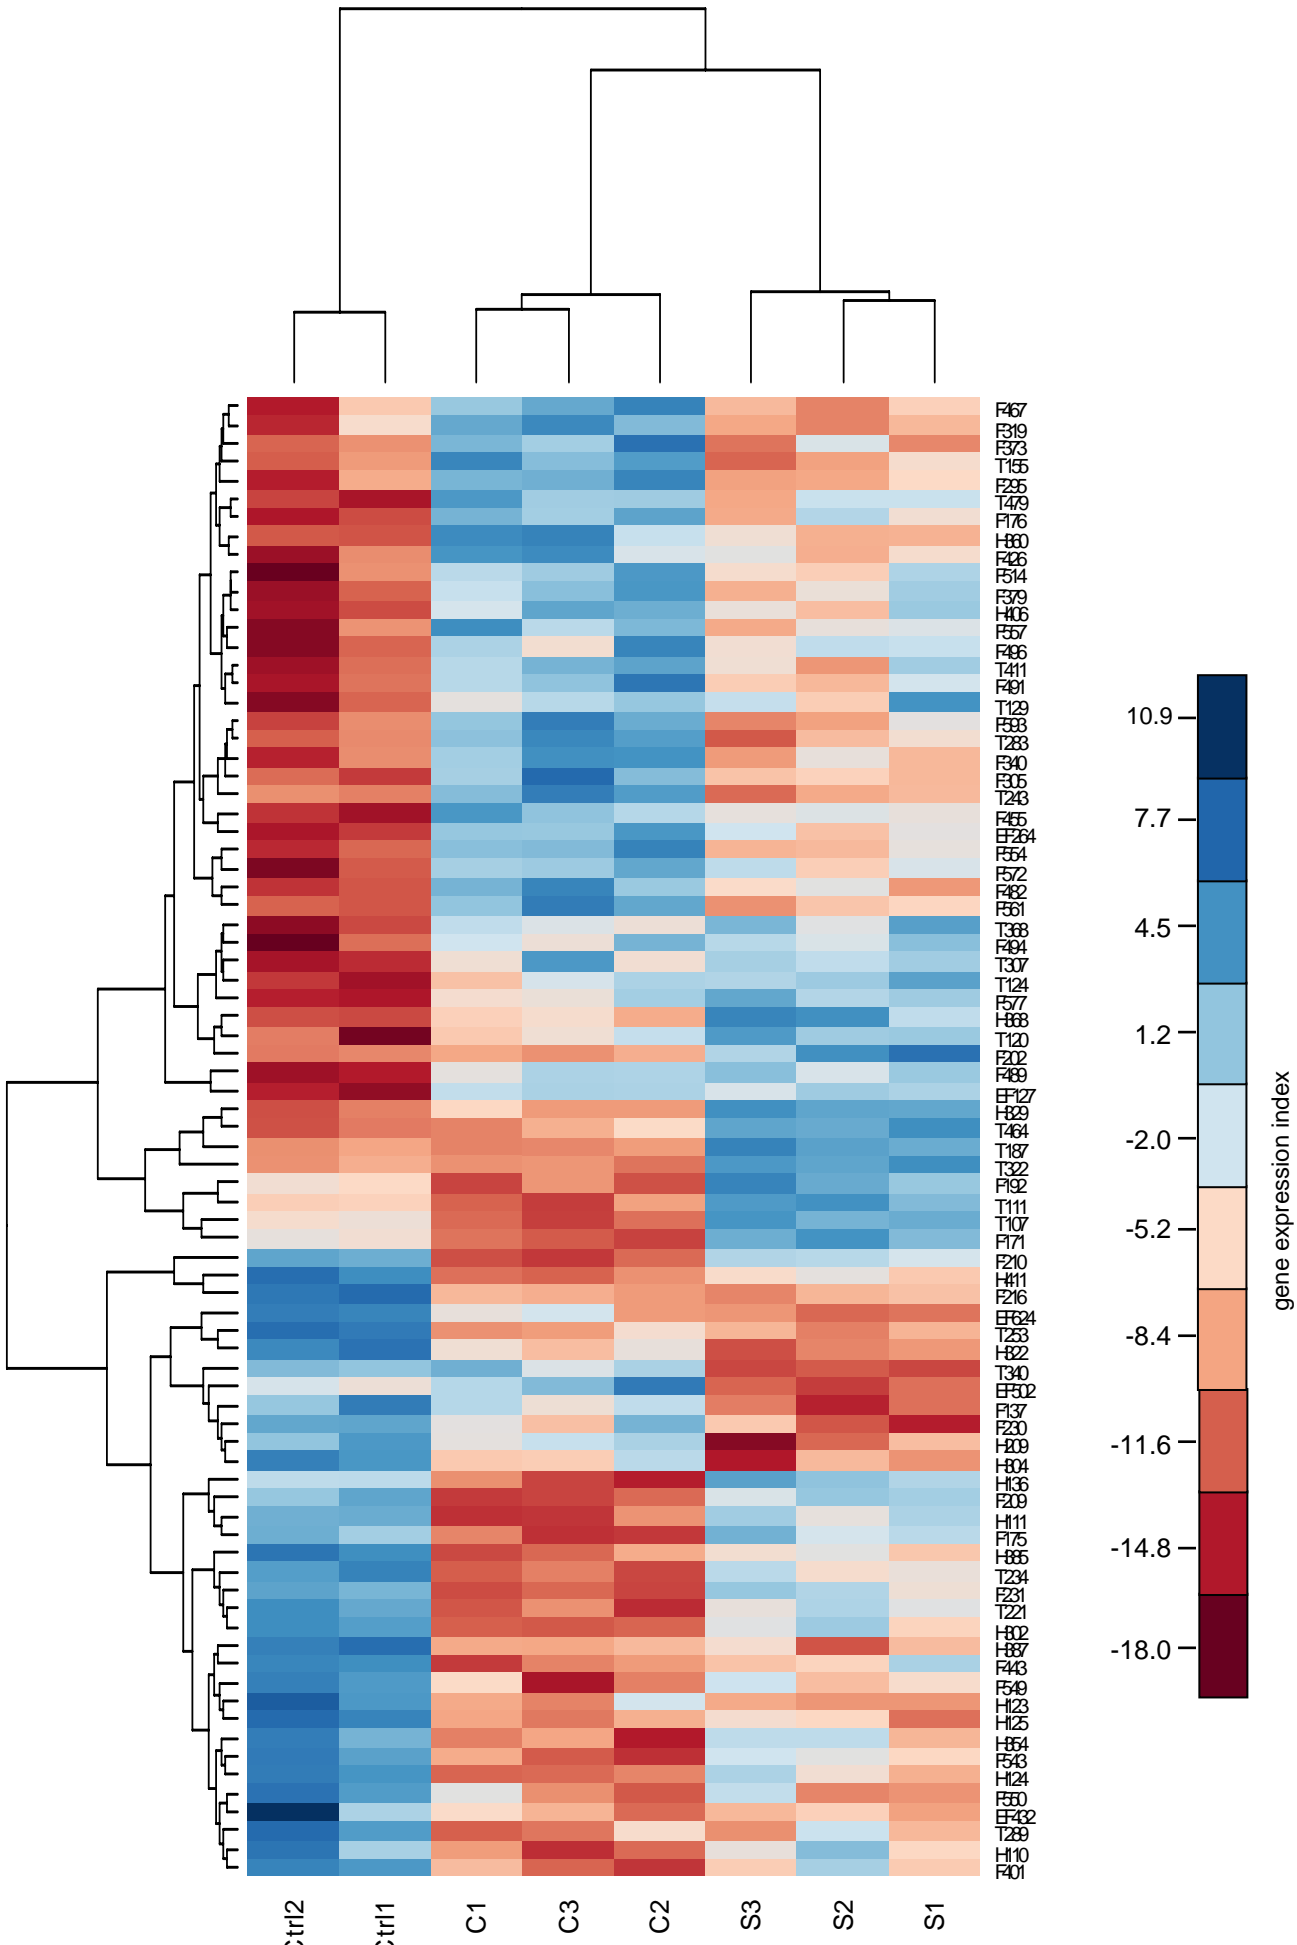

Ctrl2 Ctrl1 C1 C3 C2 S3 S2 S1

F467  
F319  
F373  
T155  
F295  
T479  
F176  
H880  
F426  
F514  
F379  
H406  
F557  
F496  
T441  
F491  
T129  
F588  
T288  
F340  
F335  
T248  
F455  
EF284  
F554  
F572  
F492  
F561  
T368  
F494  
T307  
T124  
F577  
H888  
T120  
F202  
F489  
EF127  
H829  
T464  
T187  
T322  
F192  
T111  
T107  
F171  
F210  
H411  
F216  
EF624  
T253  
H822  
T340  
EF502  
F137  
F230  
H209  
H804  
H136  
F209  
H111  
F175  
H886  
T234  
F231  
T221  
H802  
H887  
F443  
F549  
H123  
H125  
H554  
F543  
H124  
F550  
EF432  
T289  
H110  
F401

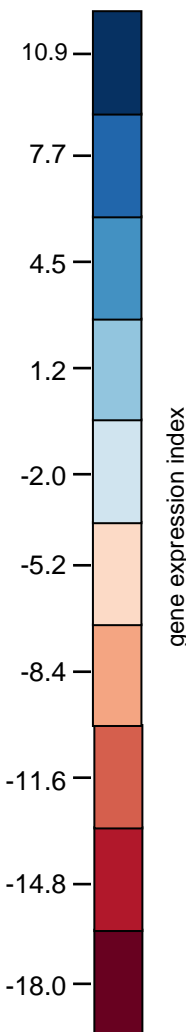

Supplement: 1471-2229-8-11-S3.pdf [file 1471-2229-8-11-S3.pdf]
