# Supplementary material for: Transcriptomic identification of candidate genes involved in sunflower responses to chilling and salt stresses based on cDNA microarray analysis
Source: PubMed Central journal article supplement (PMC2265713; doi:10.1186/1471-2229-8-11), 2008-01-26

EST EF127

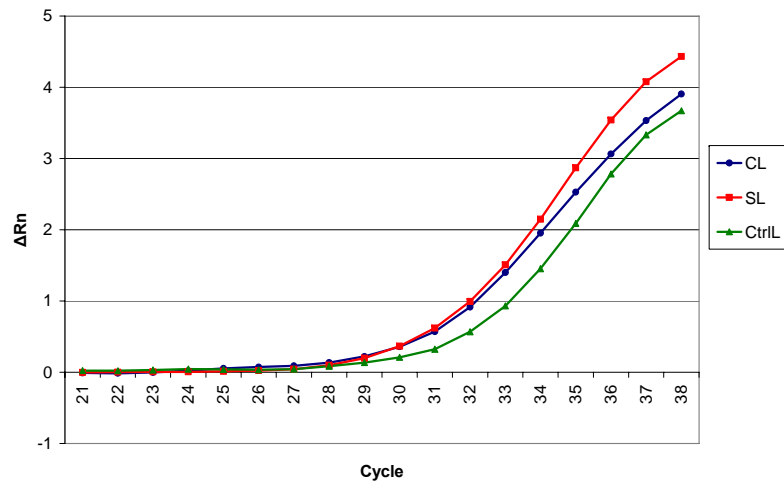

EST EF502

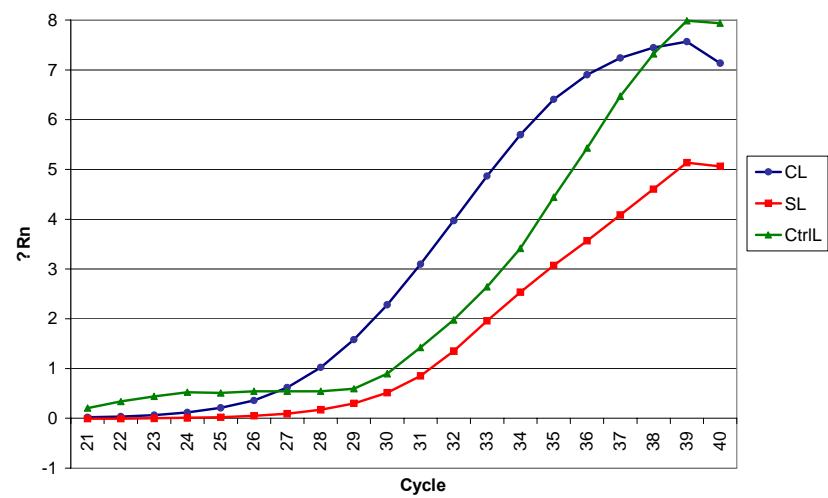

EST F171

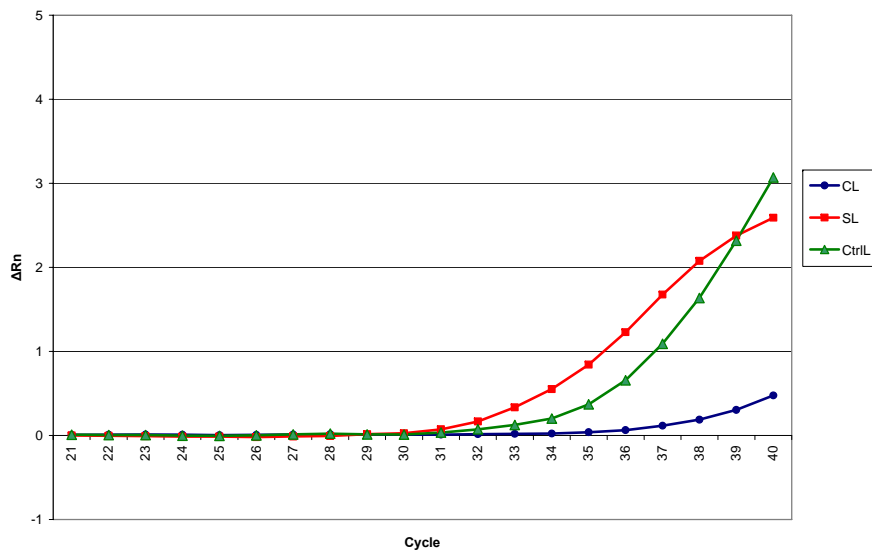

EST F455

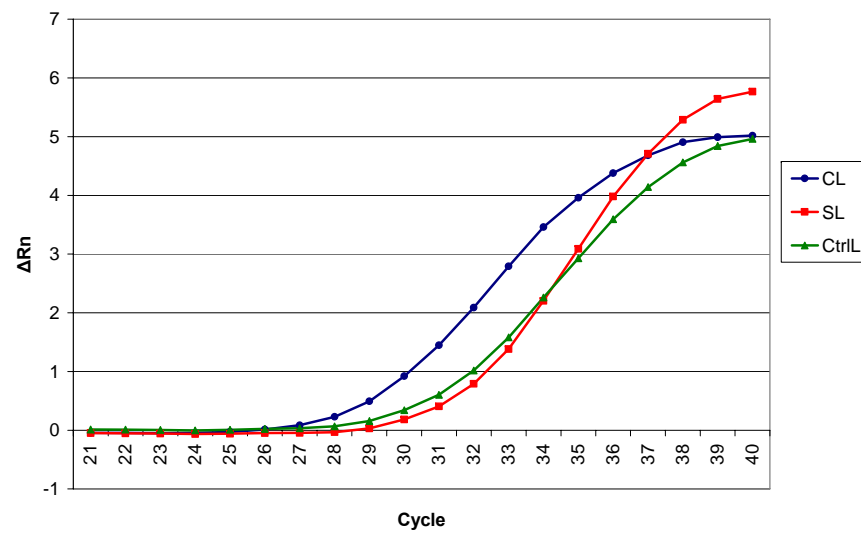

EST H360

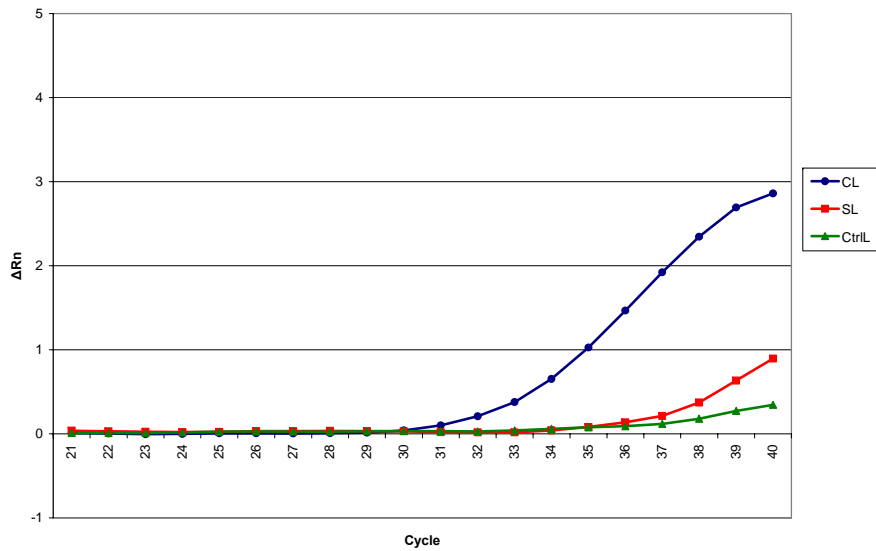

EST T124

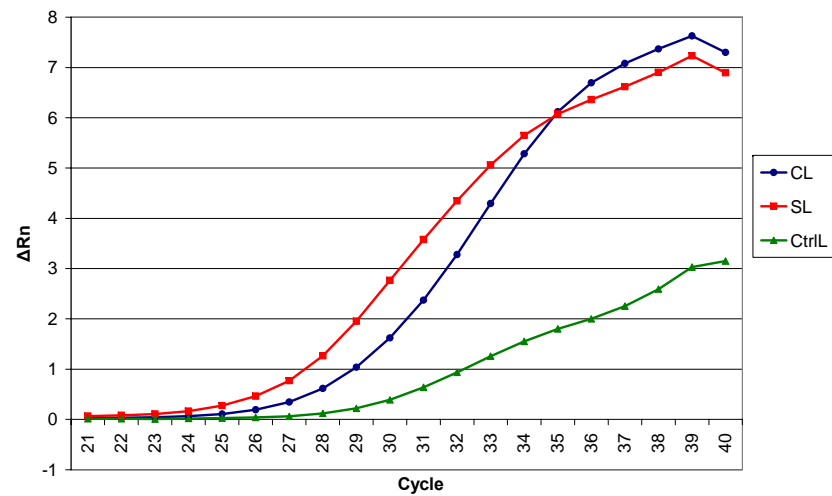

EST T411

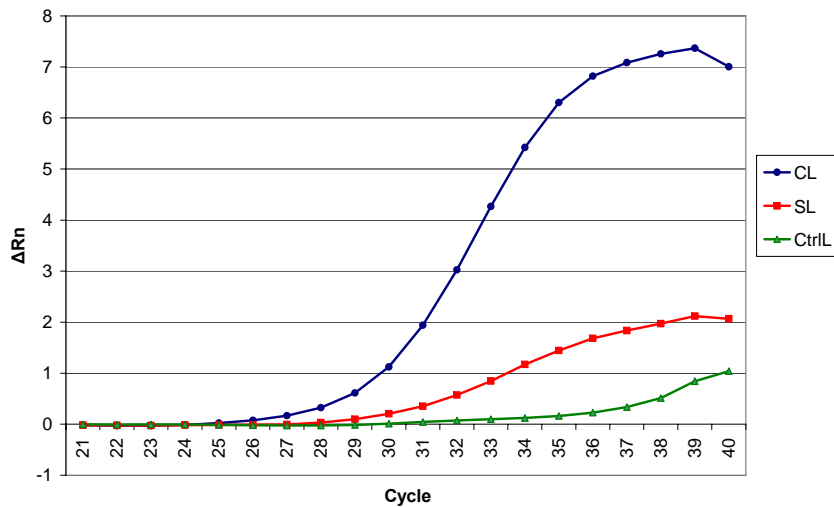

EST EF264

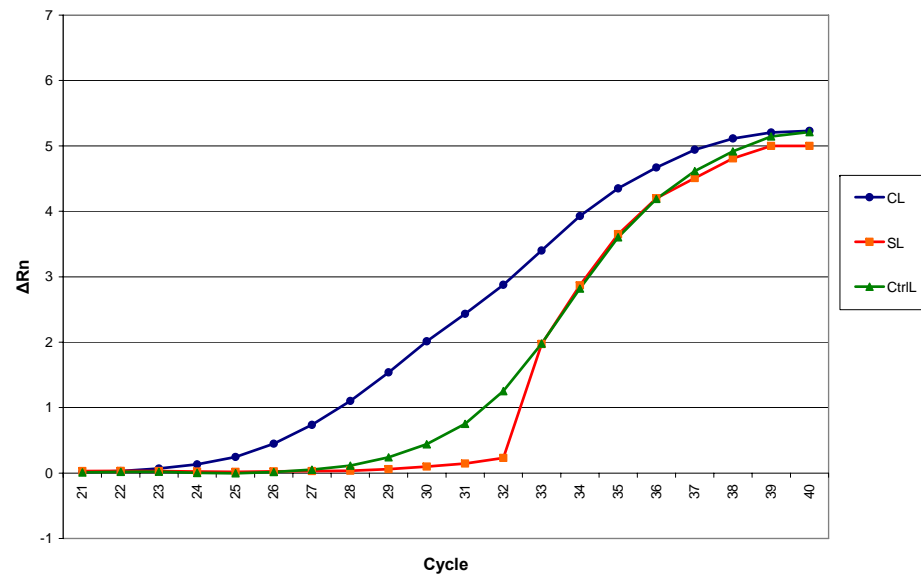

EST F379

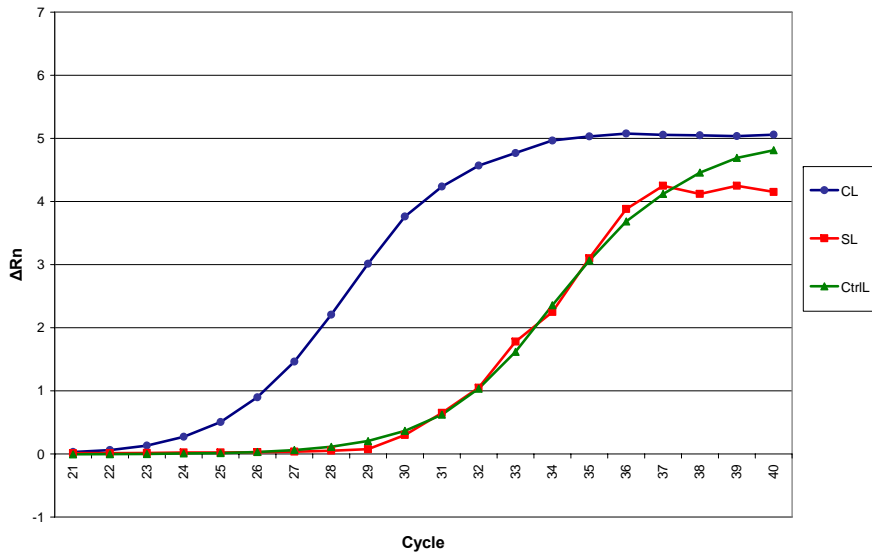

EST F443

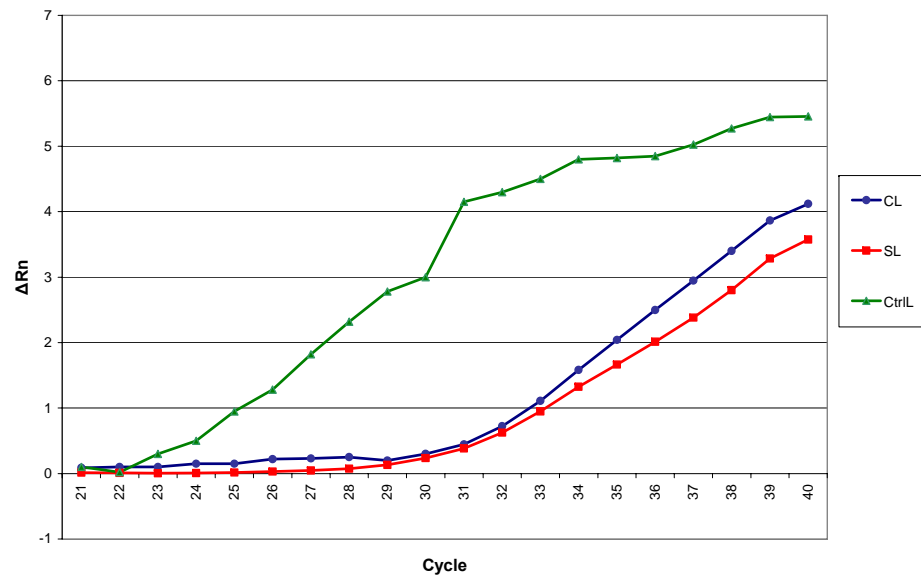

Supplement: 1471-2229-8-11-S4.pdf [file 1471-2229-8-11-S4.pdf]
